# Supplementary material
Source: MDPI journal article supplement (https://www.mdpi.com/2073-4441/12/10/2751)
Supplement: s1 [file s1]

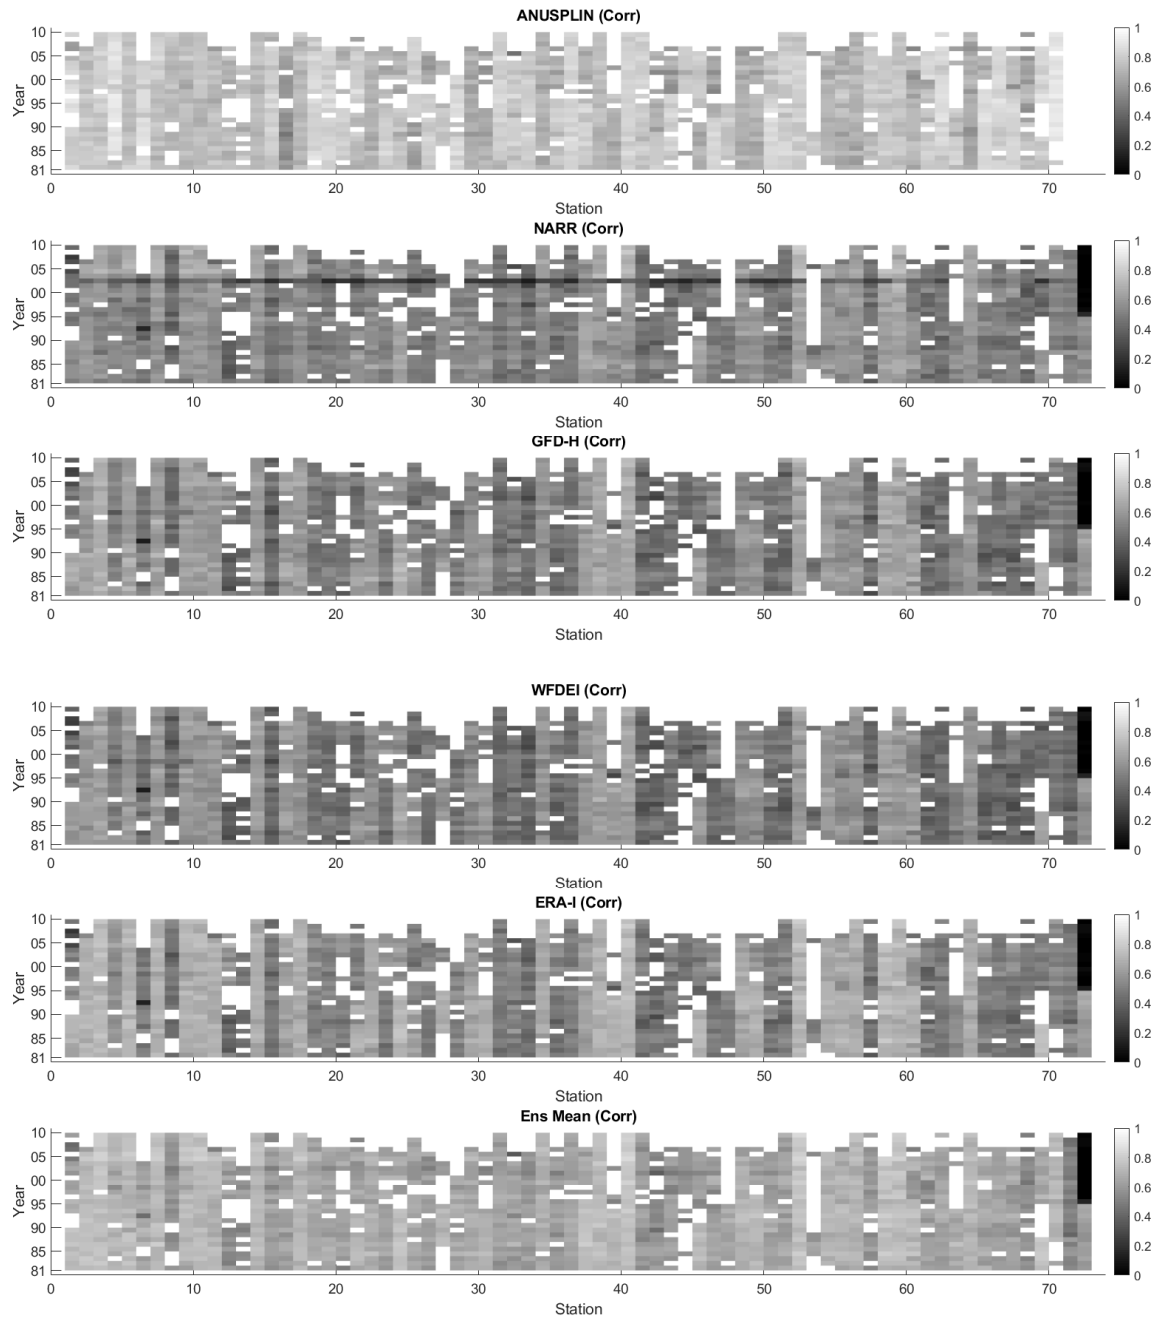

Figure S.1 Daily precipitation spatially aggregated annual correlation with reference to the AHCCD observed data set in each gauge (1981-2010). White represents years excluded for missing data. If a single month was rejected, that year was also excluded.

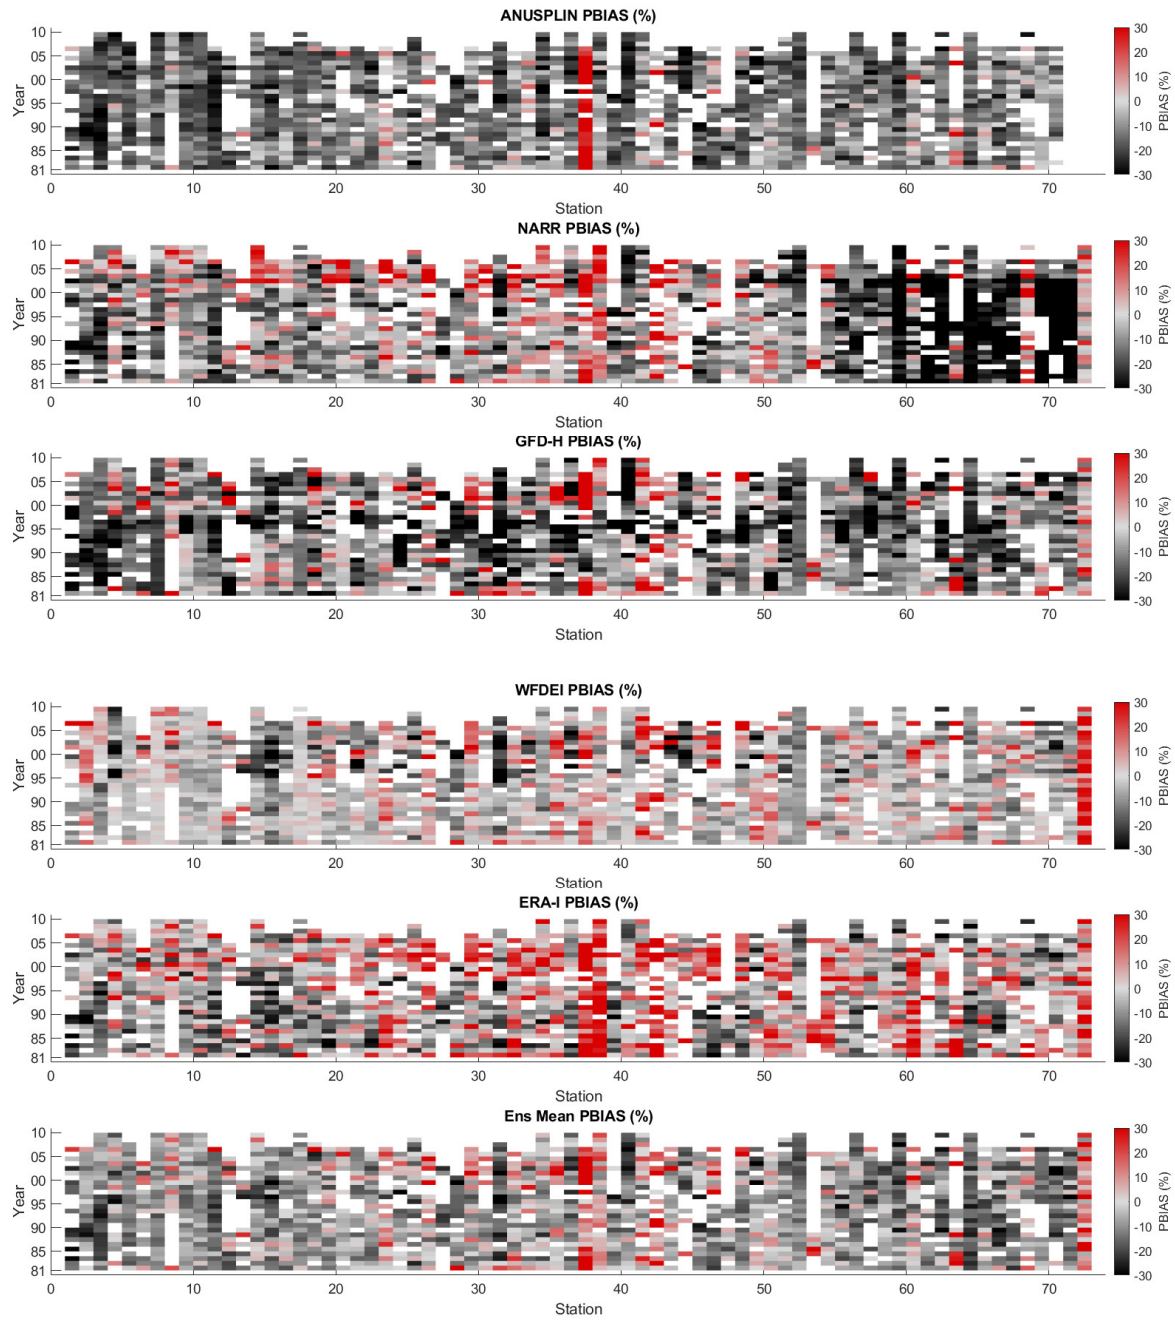

Figure S.2 Daily precipitation spatially aggregated annual PBIAS with reference to the AHCCD observed data set in each gauge (1981-2010). White represents years excluded for missing data. If a single month was rejected, that year was also excluded.

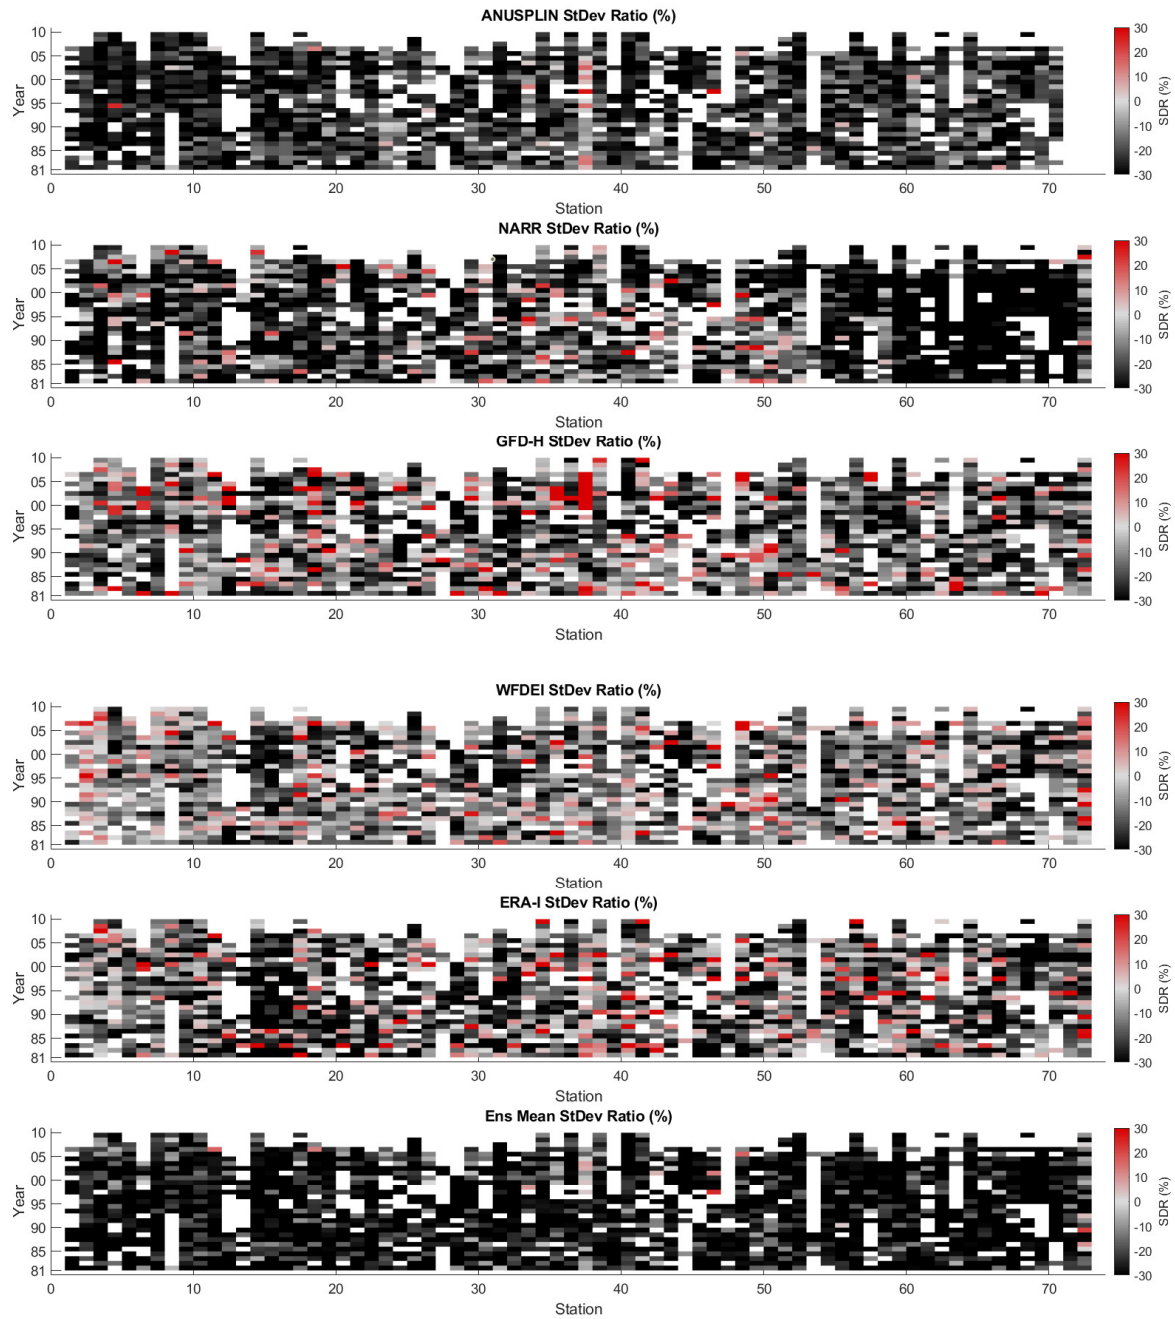

Figure S.3 Daily precipitation spatially aggregated annual SEDI score with reference to the AHCCD observed data set in each gauge (1981-2010). White represents years excluded for missing data. If a single month was rejected, that year was also excluded.

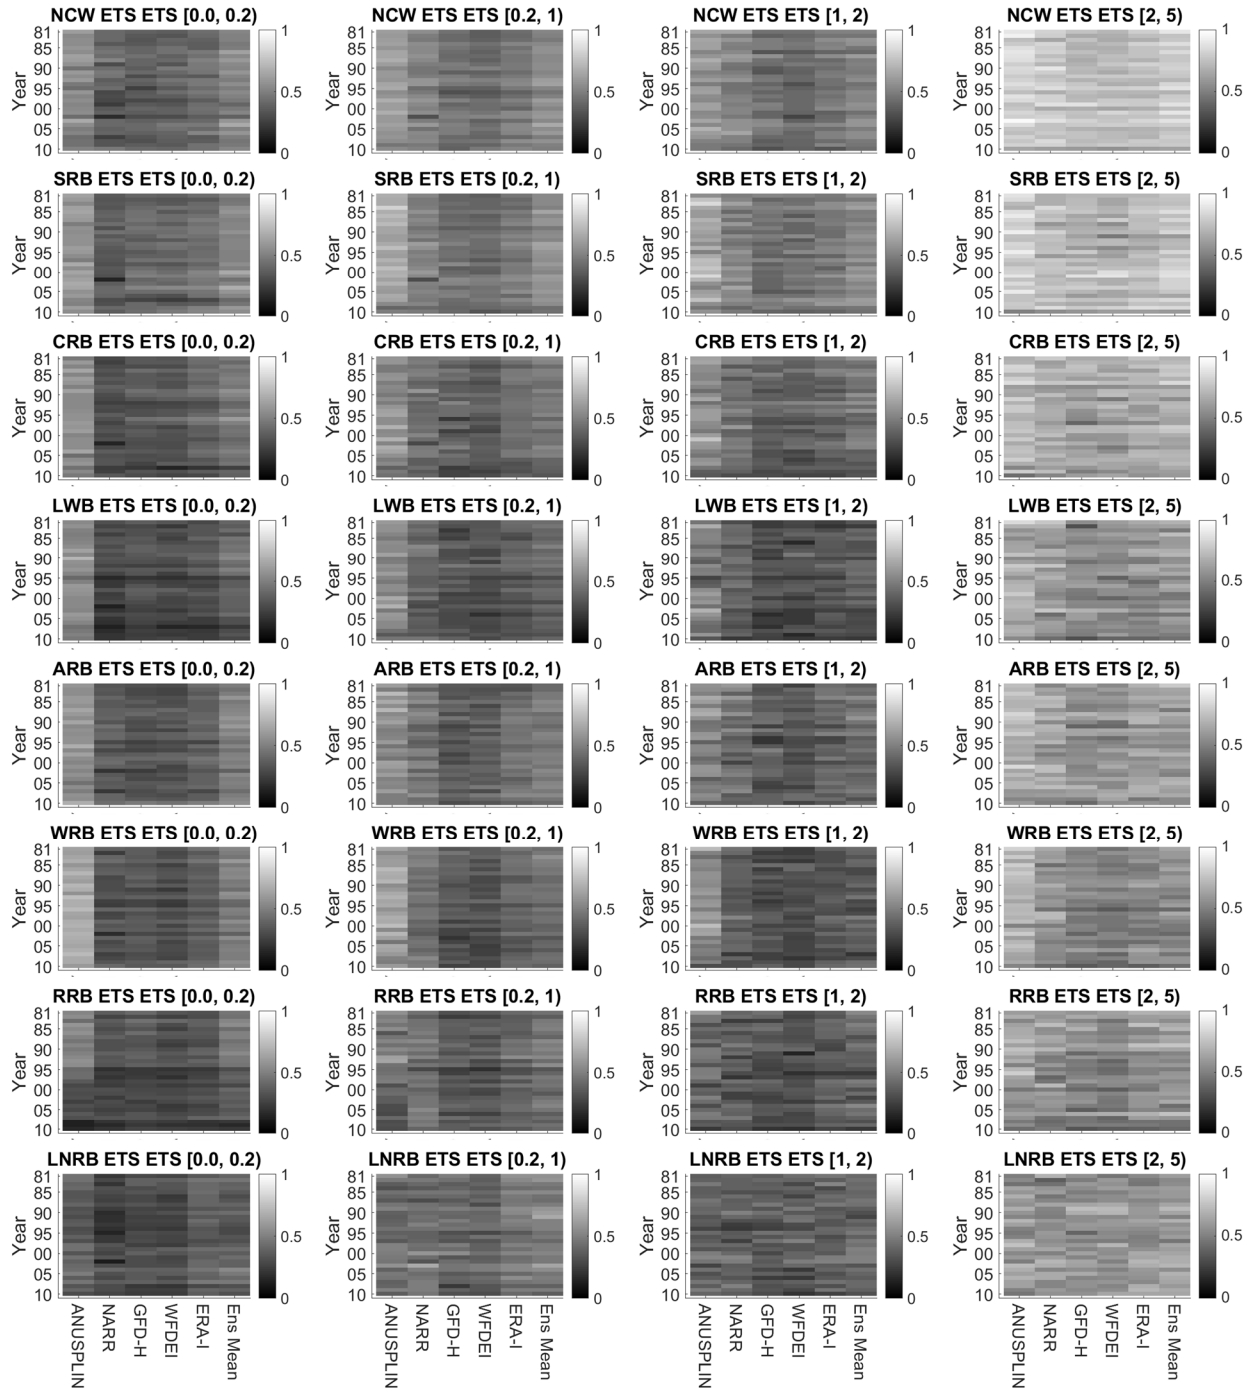

Figure S.4 Daily precipitation spatially aggregated annual ETS score with reference to the AHCCD observed data set in each sub-basin (1981-2010). Scores for 0-5 mm bins are presented.

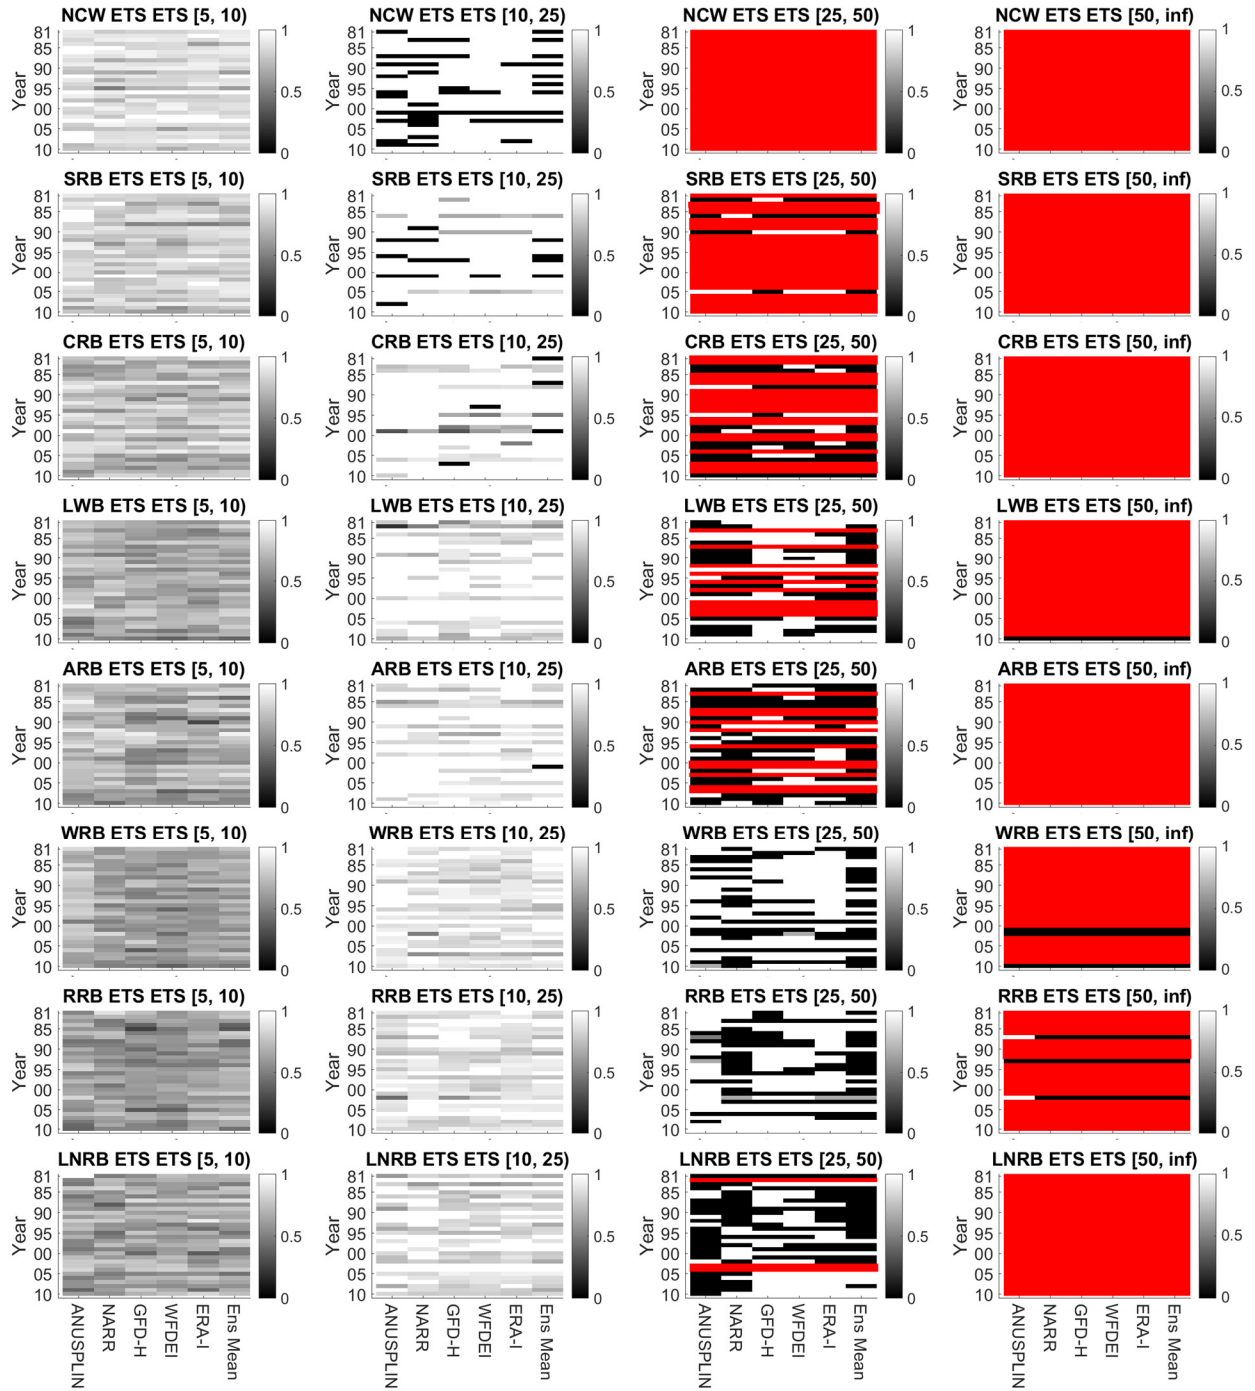

Figure S.5 Daily precipitation spatially aggregated annual ETS score with reference to the AHCCD observed data set in each sub-basin (1981-2010). Scores for 5-inf mm bins are presented. Red represented no data.

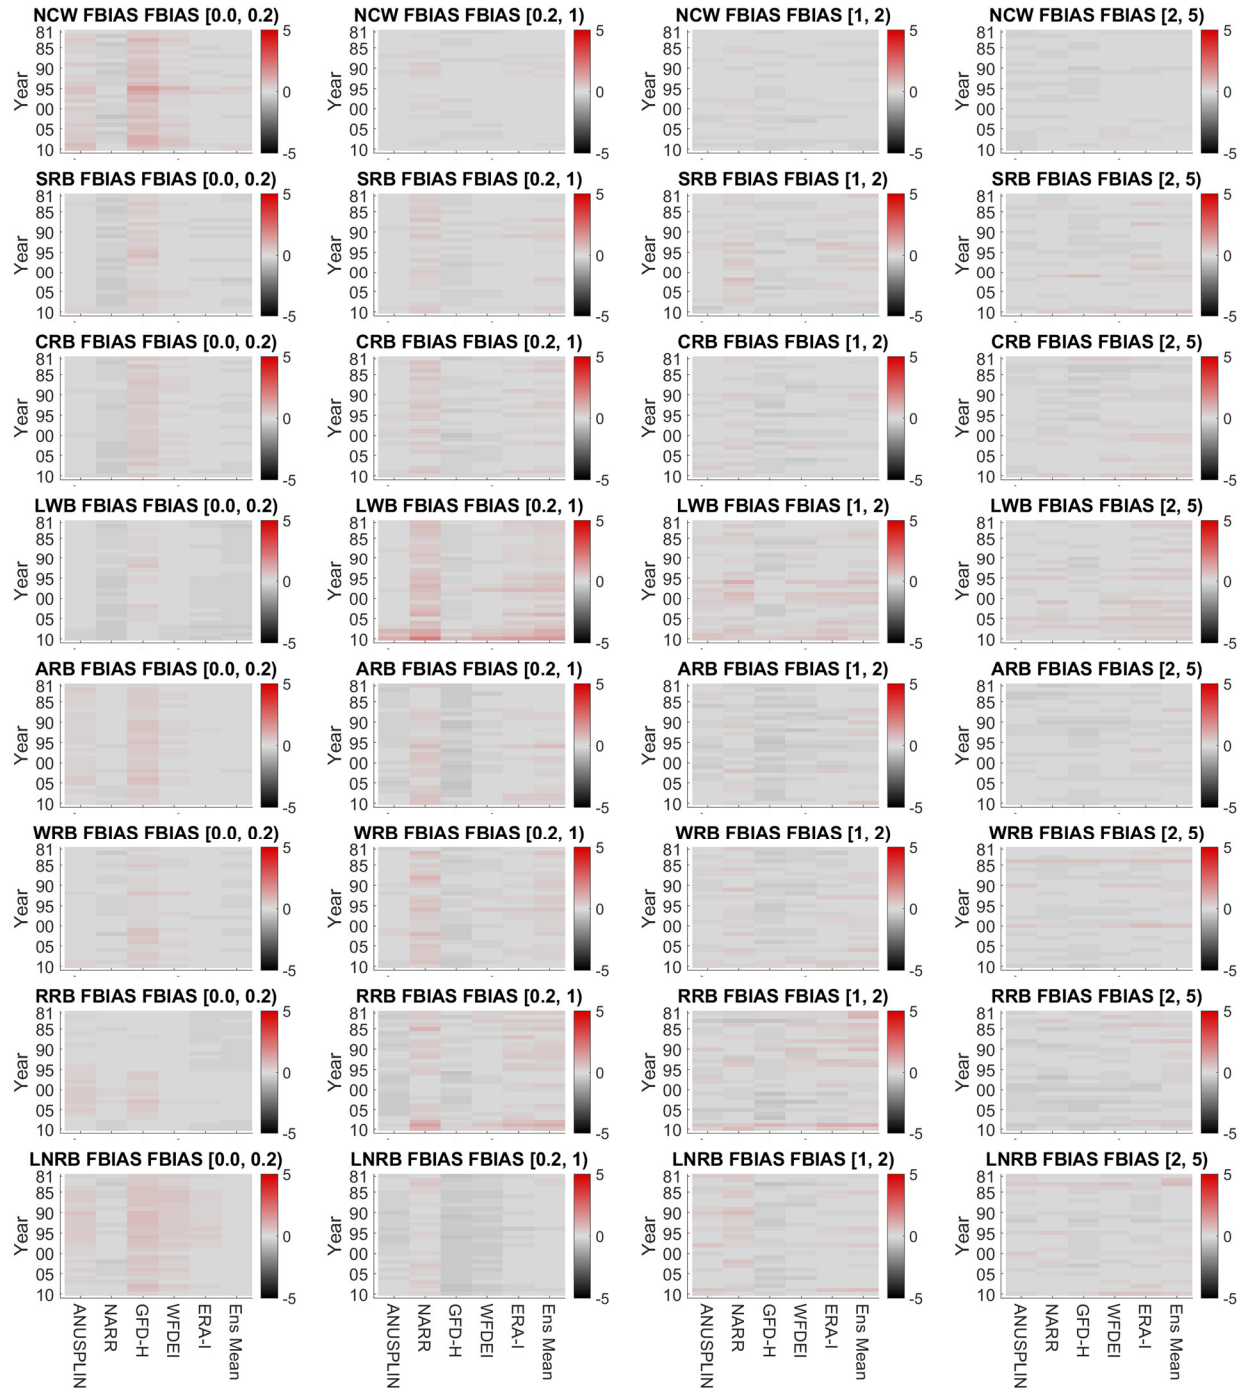

Figure S.6 Daily precipitation spatially aggregated annual FBIAS score with reference to the AHCCD observed data set in each sub-basin (1981-2010). Scores for 0-5 mm bins are presented.

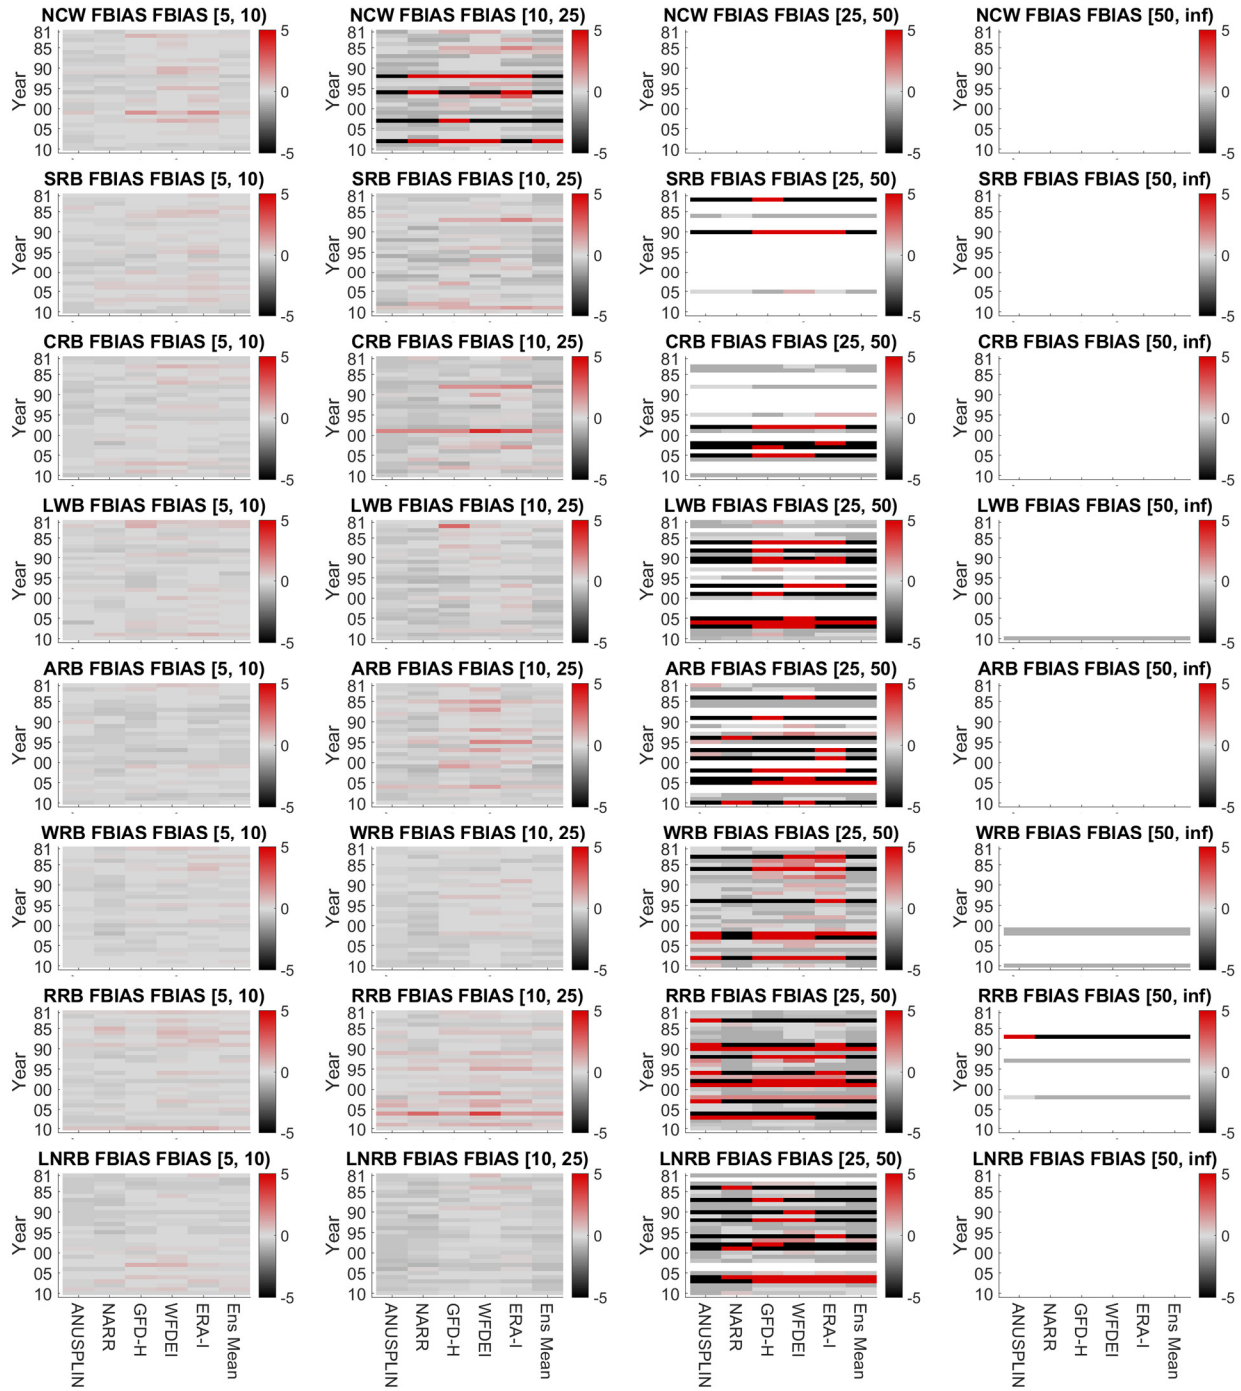

Figure S.7 Daily precipitation spatially aggregated annual ETS score with reference to the AHCCD observed data set in each sub-basin (1981-2010). Scores for 5-inf mm bins are presented. White represented no data.

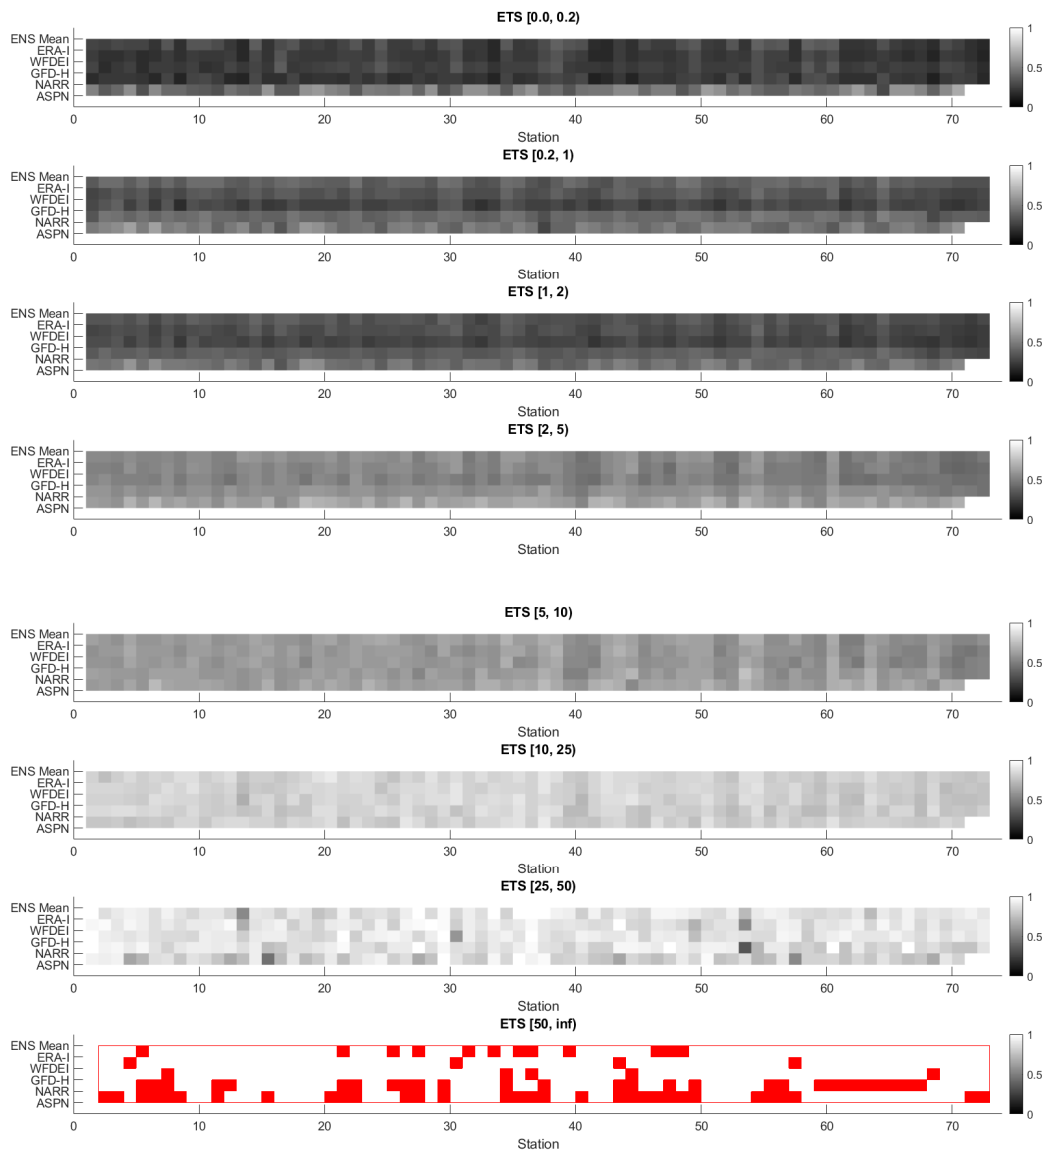

Figure S.8 Daily precipitation spatially aggregated annual ETS score with reference to the AHCCD observed data set in each gauge (period mean for 1981-2010). Red represented no data.



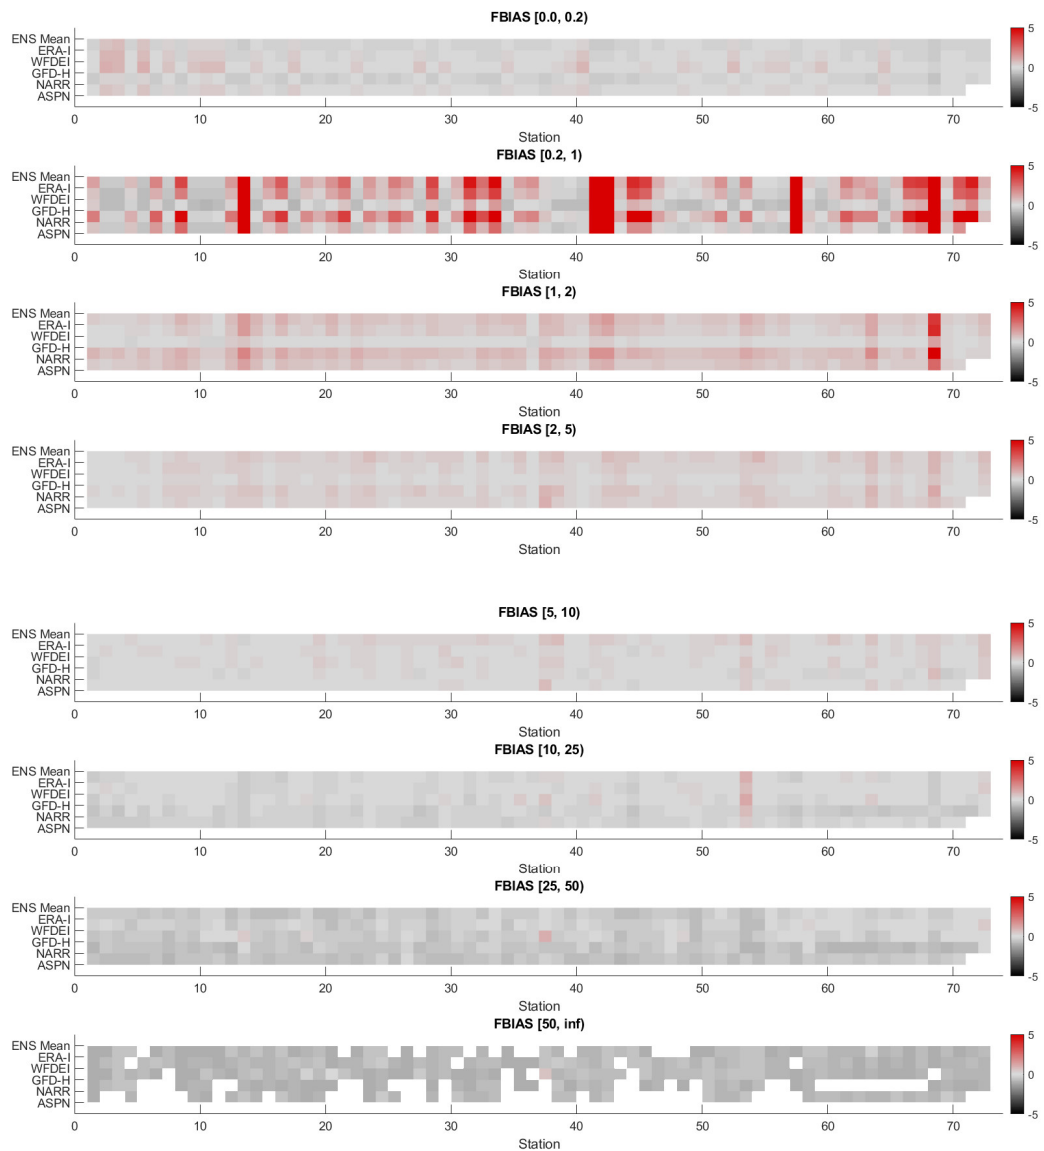

Figure S.9 Daily precipitation spatially aggregated annual FBIS score with reference to the AHCCD observed data set in each gauge (period mean for 1981-2010). White represented no data.

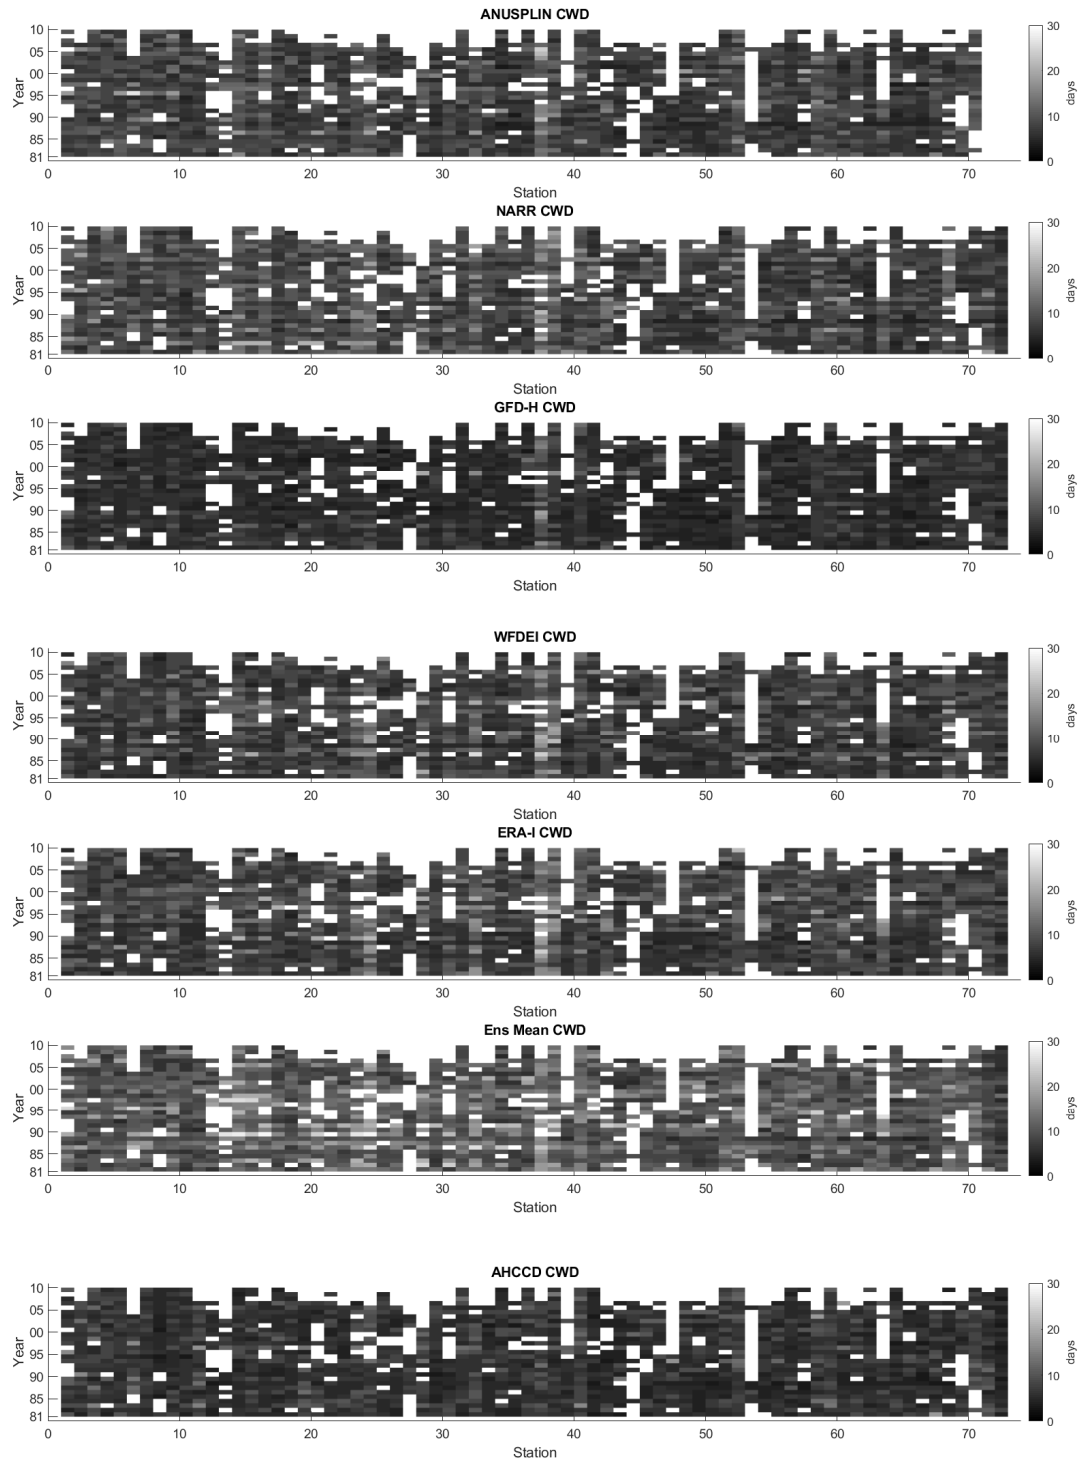

Figure S.10 Daily precipitation spatially aggregated annual CDD score with reference to the AHCCD observed data set in each gauge (1981-2010). White represents years excluded for missing data. If a single month was rejected, that year was also excluded.

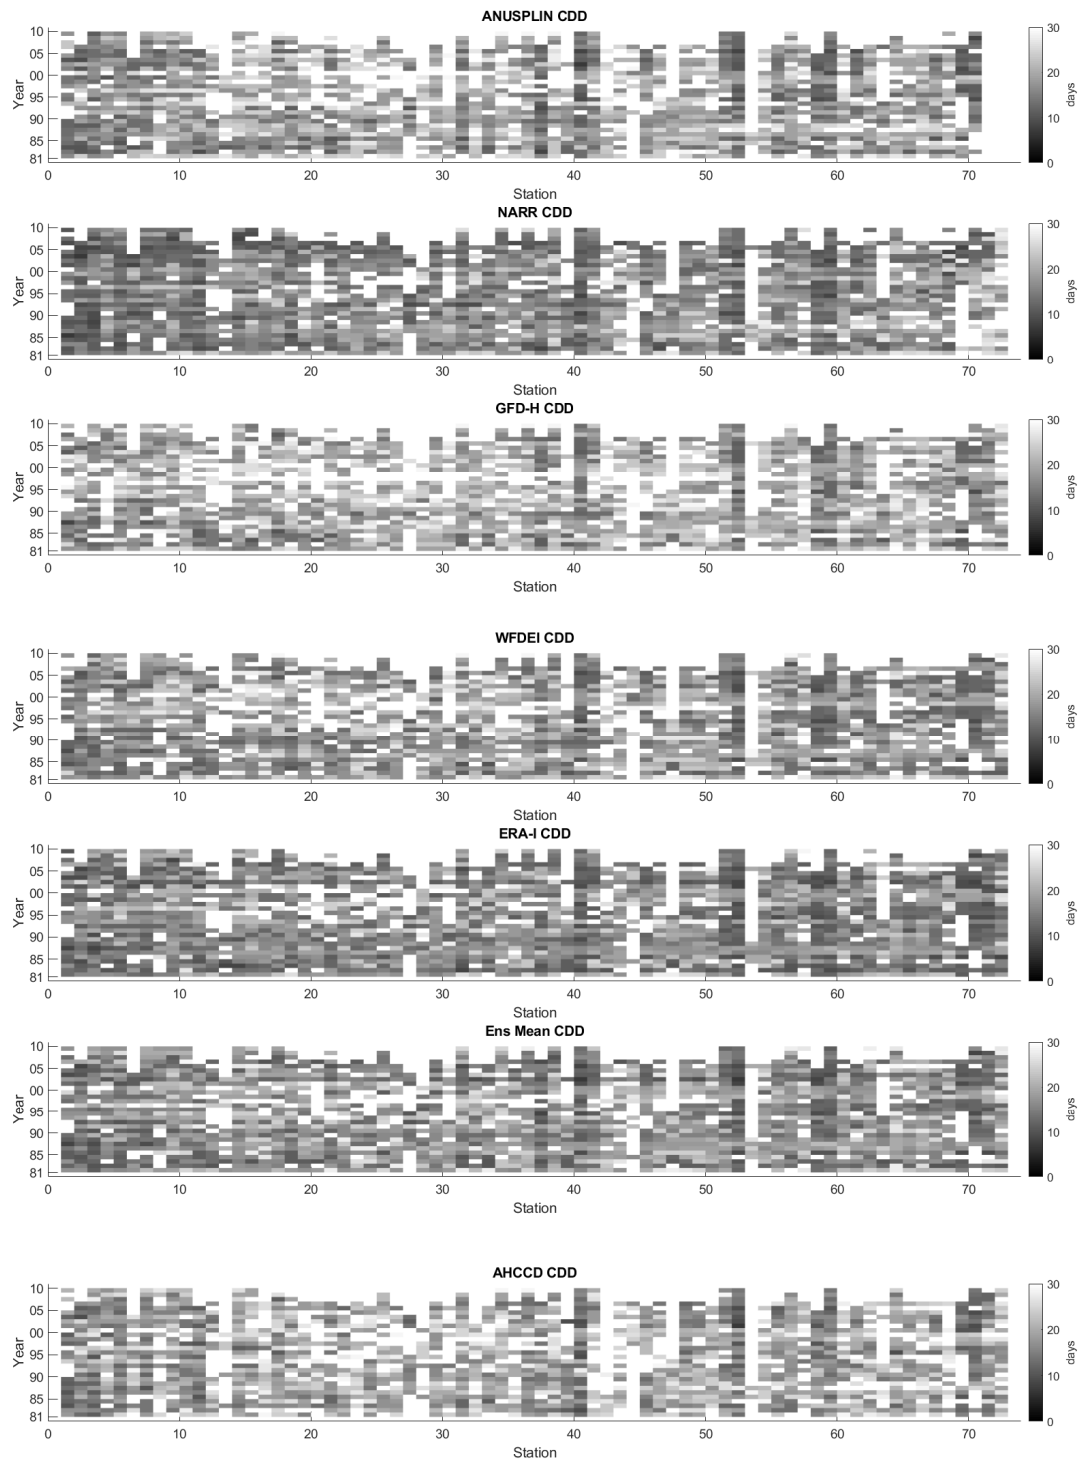

Figure S.11 Daily precipitation spatially aggregated annual CWD, with AHCCD observed data set presented for reference, in each gauge (1981-2010). White represents years excluded for missing data. If a single month was rejected, that year was also excluded.

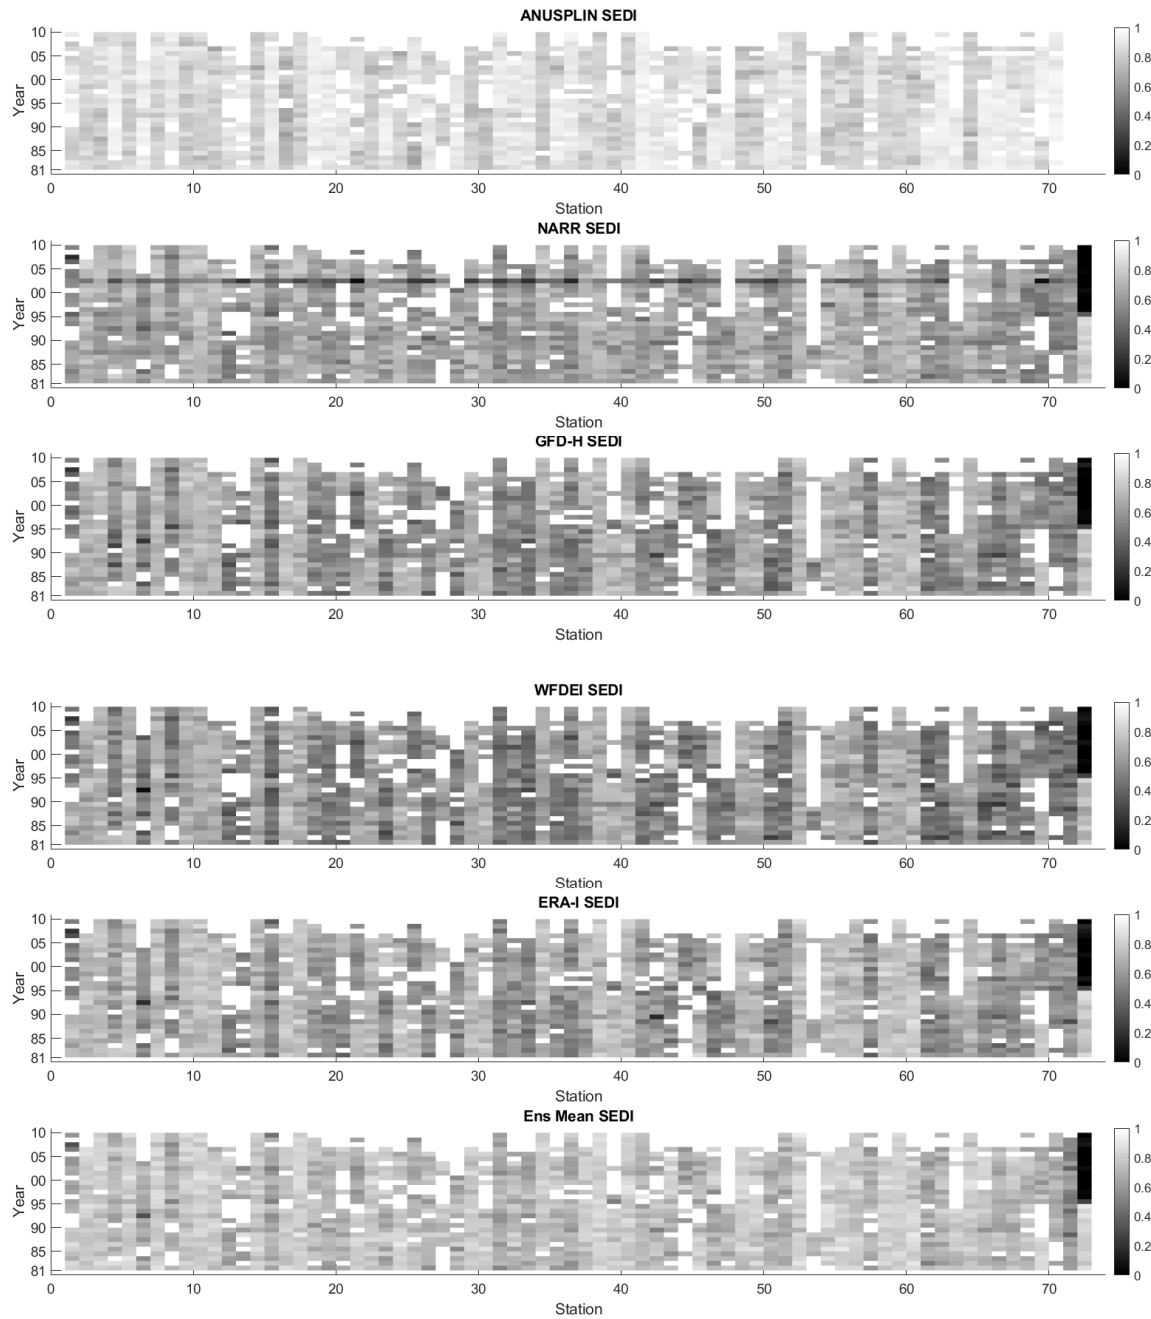

Figure S.12 Daily precipitation spatially aggregated annual SEDI score with reference to the AHCCD observed data set in each gauge (1981-2010). White represents years excluded for missing data. If a single month was rejected, that year was also excluded.

Table S.1: Final list of ground-based climate stations with mean yearly precipitation and the standard deviation of yearly precipitation. Stations are ordered from highest to lowest latitude. Station order is consistent for station performance metric plots.

| Station Number | Name               | Latitude Longitude |         |                 | Mean yearly precipitation (mm) |       | Mean yearly precipitation standard deviation (mm) |       |
|----------------|--------------------|--------------------|---------|-----------------|--------------------------------|-------|---------------------------------------------------|-------|
|                |                    | (°N)               | (°W)    | Elev (m a.s.l.) | AHCCD                          | ECCC  | AHCCD                                             | ECCC  |
| 1              | COLLINS_BAY        | 58.18              | -103.7  | 490             | 601.1                          | 488.5 | 141.2                                             | 109.7 |
| 2              | LYNN_LAKE          | 56.87              | -101.08 | 357             | 575.0                          | 463.5 | 79.6                                              | 98.0  |
| 3              | GILLAM_A           | 56.35              | -94.72  | 145             | 610.0                          | 473.0 | 106.5                                             | 90.1  |
| 4              | BUFFALO_NARROWS    | 55.83              | -108.43 | 440             | 489.6                          | 448.8 | 86.5                                              | 89.8  |
| 5              | THOMPSON_A         | 55.8               | -97.87  | 222             | 603.4                          | 510.1 | 112.6                                             | 110.7 |
| 6              | ISLAND_FALLS       | 55.53              | -102.35 | 297             | 507.8                          | 476.2 | 71.4                                              | 73.7  |
| 7              | LA_RONGE_A         | 55.15              | -105.27 | 379             | 558.2                          | 486.0 | 82.4                                              | 82.4  |
| 8              | FLIN_FLON          | 54.77              | -101.88 | 320             | 477.8                          | 452.9 | 83.4                                              | 86.5  |
| 9              | COLD_LAKE_A        | 54.42              | -110.28 | 541             | 498.8                          | 419.8 | 78.9                                              | 79.2  |
| 10             | THE_PAS_A          | 53.97              | -101.1  | 270             | 530.6                          | 445.8 | 81.7                                              | 86.6  |
| 11             | NORWAY_HOUSE       | 53.96              | -97.85  | 224             | 611.2                          | 514.8 | 83.5                                              | 86.2  |
| 12             | WASKESIU_LAKE      | 53.92              | -106.07 | 569             | 503.8                          | 452.8 | 94.8                                              | 104.7 |
| 13             | SION               | 53.88              | -114.12 | 701             | 525.3                          | 498.3 | 113.3                                             | 117.8 |
| 14             | EDMONTON_INTL_A    | 53.57              | -113.52 | 723             | 511.6                          | 447.0 | 85.2                                              | 86.3  |
| 15             | RANFURLY_2NW       | 53.42              | -111.73 | 673             | 495.1                          | 452.7 | 93.9                                              | 96.5  |
| 16             | CALMAR             | 53.28              | -113.85 | 720             | 547.5                          | 515.9 | 76.0                                              | 79.5  |
| 17             | PRINCE_ALBERT_A    | 53.22              | -105.67 | 428             | 506.9                          | 431.0 | 89.5                                              | 98.2  |
| 18             | GRAND_RAPIDS_HYDRO | 53.15              | -99.28  | 223             | 533.7                          | 499.0 | 84.8                                              | 102.8 |
| 19             | WASECA             | 53.13              | -109.4  | 638             | 457.7                          | 420.2 | 94.3                                              | 98.6  |
| 20             | CAMROSE            | 53.03              | -112.82 | 739             | 469.4                          | 431.2 | 60.0                                              | 64.3  |
| 21             | HUDSON_BAY         | 52.82              | -102.32 | 358             | 534.9                          | 433.9 | 129.7                                             | 97.7  |
| 22             | NORTH_BATTLEFORD   | 52.77              | -108.25 | 548             | 454.0                          | 368.0 | 57.4                                              | 69.4  |
| 23             | LACOMBE            | 52.45              | -113.75 | 860             | 481.4                          | 411.9 | 107.5                                             | 85.3  |
| 24             | ROCKY_MNT_HOUSE    | 52.43              | -114.92 | 988             | 605.1                          | 491.7 | 132.1                                             | 92.0  |
| 25             | PILGER             | 52.42              | -105.15 | 552             | 499.4                          | 453.4 | 115.1                                             | 122.4 |
| 26             | SCOTT_CDA          | 52.37              | -108.83 | 660             | 383.8                          | 353.9 | 68.7                                              | 69.9  |
| 27             | BERENS_RIVER       | 52.35              | -97.03  | 222             | 584.1                          | 508.5 | 57.3                                              | 75.2  |
| 28             | STETTLER           | 52.33              | -112.72 | 821             | 519.1                          | 477.4 | 85.1                                              | 91.0  |
| 29             | SASKATOON_INTL_A   | 52.17              | -106.72 | 504             | 418.4                          | 350.3 | 84.6                                              | 90.2  |
| 30             | CORONATION         | 52.08              | -111.45 | 791             | 426.7                          | 358.4 | 107.1                                             | 77.3  |
| 31             | PELLY              | 52.08              | -101.87 | 509             | 629.5                          | 580.3 | 115.9                                             | 119.8 |
| 32             | OLDS               | 51.78              | -114.1  | 1046            | 513.7                          | 492.1 | 91.7                                              | 94.7  |
| 33             | COTE               | 51.52              | -101.78 | 450             | 500.9                          | 459.4 | 64.5                                              | 70.2  |
| 34             | KINDERSLEY         | 51.52              | -109.18 | 694             | 401.9                          | 321.5 | 75.3                                              | 82.5  |
| 35             | OUTLOOK_PFRA       | 51.48              | -107.05 | 541             | 375.4                          | 341.9 | 71.2                                              | 75.5  |
| 36             | KELLIHER           | 51.26              | -103.75 | 676             | 534.4                          | 486.3 | 95.0                                              | 101.0 |
| 37             | BANFF              | 51.2               | -115.55 | 1397            | 497.7                          | 443.3 | 122.8                                             | 105.3 |
| 38             | CALGARY_INTL_A     | 51.11              | -114.02 | 1084            | 482.2                          | 415.7 | 64.5                                              | 65.2  |
| 39             | DAUPHIN_A          | 51.1               | -100.05 | 305             | 593.8                          | 485.3 | 53.7                                              | 75.6  |

|    |                                           |         |          |       |       |       |       |       |
|----|-------------------------------------------|---------|----------|-------|-------|-------|-------|-------|
| 40 | RED_LAKE_A                                | 51.07   | -93.8    | 386   | 821.6 | 683.5 | 129.3 | 142.6 |
| 41 | ARBORG                                    | 50.93   | -97.08   | 224   | 548.3 | 509.3 | 86.6  | 91.0  |
| 42 | GLEICHEN                                  | 50.88   | -113.05  | 905   | 355.3 | 338.5 | 76.2  | 79.1  |
| 43 | LEADER                                    | 50.88   | -109.53  | 676   | 356.6 | 327.9 | 75.8  | 68.9  |
| 44 | JENNER                                    | 50.72   | -111.2   | 755   | 405.6 | 375.1 | 107.8 | 111.0 |
| 45 | GIMLI                                     | 50.63   | -97.05   | 230   | 611.5 | 545.8 | 96.7  | 100.9 |
| 46 | INDIAN_HEAD_CDA                           | 50.55   | -103.65  | 579   | 474.0 | 429.2 | 97.1  | 107.3 |
| 47 | BIRTLE                                    | 50.43   | -101.05  | 522   | 514.6 | 466.0 | 87.3  | 94.6  |
| 48 | REGINA_INTL_A                             | 50.43   | -104.67  | 577   | 460.6 | 388.5 | 87.1  | 91.5  |
| 49 | MOOSE_JAW                                 | 50.33   | -105.55  | 577   | 454.6 | 418.2 | 127.9 | 130.3 |
| 50 | SWIFT_CURRENT_A                           | 50.3    | -107.68  | 817   | 403.0 | 403.3 | 106.9 | 90.2  |
| 51 | PINAWA_WNRE                               | 50.18   | -96.07   | 267   | 652.3 | 591.9 | 96.5  | 116.4 |
| 52 | SIoux_LOOKOUT_A                           | 50.12   | -91.9    | 383   | 865.5 | 769.1 | 152.3 | 157.9 |
| 53 | VAUXHALL                                  | 50.05   | -112.13  | 779   | 358.3 | 341.9 | 103.3 | 102.0 |
| 54 | MEDICINE_HAT                              | 50.02   | -110.72  | 717   | 384.9 | 333.1 | 95.4  | 107.3 |
| 55 | WINNIPEG_A                                | 49.92   | -97.23   | 239   | 592.4 | 516.4 | 100.7 | 105.1 |
| 56 | BRANDON                                   | 49.91   | -99.95   | 363   | 557.7 | 469.8 | 91.5  | 99.7  |
| 57 | YELLOW_GRASS                              | 49.82   | -104.18  | 580   | 481.4 | 439.8 | 99.8  | 108.1 |
| 58 | DRYDEN                                    | 49.78   | -92.83   | 413   | 795.3 | 719.8 | 107.8 | 118.4 |
| 59 | KENORA_A                                  | 49.78   | -94.37   | 406   | 801.6 | 714.1 | 142.5 | 152.1 |
| 60 | LETHBRIDGE_CDA                            | 49.63   | -112.8   | 929   | 407.4 | 235.1 | 152.8 | 109.2 |
| 61 | INDIAN_BAY                                | 49.62   | -95.2    | 327   | 672.8 | 623.5 | 117.1 | 123.6 |
| 62 | CYPRESS_RIVER                             | 49.55   | -99.08   | 374   | 581.2 | 526.8 | 77.4  | 86.2  |
| 63 | PINCHER_CREEK                             | 49.52   | -113.98  | 1190  | 519.3 | 481.3 | 125.3 | 135.1 |
| 64 | ESTEVAN_A                                 | 49.22   | -102.97  | 581   | 511.0 | 426.8 | 90.6  | 98.3  |
| 65 | MORDEN                                    | 49.18   | -98.08   | 298   | 561.4 | 526.3 | 119.9 | 120.8 |
| 66 | PIERSON                                   | 49.18   | -101.27  | 469   | 517.3 | 457.8 | 95.0  | 104.9 |
| 67 | SPRAGUE                                   | 49.02   | -95.6    | 329   | 686.3 | 616.0 | 145.3 | 97.9  |
| 68 | CARWAY                                    | 49      | -113.37  | 1354  | 560.8 | 544.7 | 134.7 | 137.8 |
| 69 | ATIKOKAN                                  | 48.8    | -91.58   | 442   | 792.4 | 662.1 | 282.1 | 124.6 |
| 70 | MINE_CENTRE                               | 48.8    | -92.6    | 361   | 823.8 | 784.8 | 143.9 | 150.4 |
| 71 | FORT_FRANCES_A                            | 48.65   | -93.43   | 342   | 775.3 | 726.1 | 118.7 | 134.1 |
| 72 | GRAND FORKS INTERNATIONAL AIRPORT, ND US  | 47.9428 | -97.1839 | 256.6 | 523.7 | 523.7 | 92.1  | 92.1  |
| 73 | FARGO HECTOR INTERNATIONAL AIRPORT, ND US | 46.9253 | -96.8111 | 274.3 | 577.2 | 577.2 | 129.2 | 129.2 |

**Table S.2.** Station coverage for each year in each basin as the percentage of stations with data available in a basin. Percentages below 100% represent the presence of one or more days with some stations missing data (AHCCD). Cells equal to 100% are left blank. The minimum (lowest data coverage day), the mean data coverage, and the maximum (best data coverage day) are presented. Mean values near 100% were rounded up to 100%.

|      | LNRB |      |     | RRB |      |     | WRB |      |     | ARB |      |     | LWB |      |     | CRB |      |     | SRB |      |     |    |
|------|------|------|-----|-----|------|-----|-----|------|-----|-----|------|-----|-----|------|-----|-----|------|-----|-----|------|-----|----|
|      | min  | mean | max | min | mean | max | min | mean | max | min | mean | max | min | mean | max | min | mean | max | min | mean | max |    |
| 1981 |      |      |     |     |      |     | 89  | 99   |     |     |      | 83  | 90  |      | 86  |     |      | 90  | 95  | 97   |     |    |
| 1982 |      |      |     |     |      |     |     |      | 83  | 97  |      | 83  | 90  |      | 86  |     |      | 90  | 96  |      |     |    |
| 1983 |      |      |     |     |      |     | 78  | 98   |     |     |      | 83  | 91  |      | 86  | 94  |      | 94  | 98  |      |     |    |
| 1984 |      |      |     | 80  |      |     | 89  | 92   |     | 92  | 99   |     | 83  | 83   | 83  | 71  | 99   |     | 97  | 99   |     |    |
| 1985 | 67   |      |     |     |      |     | 89  | 98   |     | 92  |      | 83  | 92  |      | 86  | 94  |      | 97  | 99  |      |     |    |
| 1986 |      |      |     | 80  |      |     | 89  | 99   |     | 92  |      | 83  |     |      | 86  |     |      | 97  | 99  |      |     |    |
| 1987 |      |      |     |     |      |     | 89  |      |     | 83  |      | 83  |     |      |     |     |      | 94  | 98  |      |     |    |
| 1988 |      |      |     | 80  |      |     | 89  | 98   |     | 92  |      |     |     |      | 86  |     |      | 94  | 98  |      |     |    |
| 1989 |      |      |     |     |      |     | 78  | 89   | 89  | 92  | 98   |     | 83  | 97   |     | 86  |      | 87  | 97  |      |     |    |
| 1990 |      |      |     |     |      |     | 78  | 89   | 89  | 83  |      |     |     |      | 71  | 90  |      | 90  | 96  | 97   |     |    |
| 1991 |      |      |     | 80  |      |     | 78  | 90   |     | 92  | 99   |     | 83  | 97   |     | 71  | 86   | 86  | 94  | 97   |     |    |
| 1992 |      |      |     |     |      |     | 89  | 98   |     | 92  | 99   |     | 67  | 83   | 83  | 71  | 89   |     | 87  | 95   | 97  |    |
| 1993 |      |      |     |     |      |     | 89  | 99   |     |     |      |     | 67  | 78   | 83  | 86  | 99   |     | 94  | 97   | 97  |    |
| 1994 |      |      |     | 80  |      |     | 78  | 99   |     |     |      |     | 67  | 84   |     | 86  | 99   |     | 77  | 86   | 97  |    |
| 1995 |      |      |     |     |      |     | 89  | 99   |     | 83  | 96   |     | 67  | 84   |     | 71  | 89   |     | 77  | 83   | 84  |    |
| 1996 |      |      |     |     |      |     |     |      |     | 83  | 94   |     | 83  | 94   |     | 86  | 99   |     | 77  | 89   | 97  |    |
| 1997 | 67   | 99   |     |     |      |     | 89  |      |     | 83  | 98   |     | 67  | 92   |     |     |      | 84  | 94  | 97   |     |    |
| 1998 |      |      |     | 80  | 98   |     | 89  |      |     | 83  | 93   |     | 67  | 93   |     | 86  | 99   |     | 81  | 93   | 97  |    |
| 1999 |      |      |     | 80  | 82   |     |     |      |     | 92  | 92   |     | 67  | 94   |     |     |      | 87  | 95  | 97   |     |    |
| 2000 |      |      |     |     |      |     |     |      |     | 92  | 99   |     | 83  | 93   |     | 86  | 99   |     | 90  | 98   |     |    |
| 2001 |      |      |     |     |      |     |     |      |     | 83  | 92   | 92  |     | 83   | 97  |     |      |     | 90  | 98   |     |    |
| 2002 |      |      |     |     |      |     |     |      |     | 92  | 92   | 92  |     |      |     |     |      |     | 90  | 95   | 97  |    |
| 2003 |      |      |     |     |      |     |     |      |     | 92  | 92   | 92  |     | 83   | 96  |     | 86   |     | 94  | 95   | 97  |    |
| 2004 |      |      |     |     |      |     | 89  |      |     | 92  | 92   | 92  |     | 83   | 95  |     | 86   | 96  | 87  | 94   | 97  |    |
| 2005 |      |      |     | 60  | 99   |     | 78  | 89   |     | 75  | 91   | 92  |     | 83   | 97  |     | 57   | 83  | 86  | 84   | 96  | 97 |
| 2006 |      |      |     | 80  |      |     | 78  | 89   | 89  | 75  | 85   | 92  |     | 67   | 81  | 83  | 71   | 86  | 86  | 87   | 90  | 97 |
| 2007 | 67   | 97   |     | 40  | 95   |     | 56  | 82   | 89  | 33  | 73   | 83  |     | 33   | 72  | 83  | 43   | 83  | 86  | 26   | 83  | 90 |
| 2008 | 33   | 66   | 67  | 40  | 40   | 40  | 56  | 71   | 78  | 25  | 40   | 42  |     | 33   | 54  | 67  | 43   | 55  | 57  | 32   | 38  | 45 |
| 2009 | 33   | 67   | 67  | 40  | 40   | 40  | 56  | 74   | 78  | 33  | 42   | 42  |     | 17   | 47  | 50  | 43   | 57  | 57  | 29   | 37  | 42 |
| 2010 | 33   | 66   | 67  | 40  | 40   | 40  | 56  | 75   | 78  | 33  | 41   | 42  |     | 17   | 34  | 50  | 43   | 56  | 57  | 32   | 37  | 39 |
